# Supplementary material
Source: PubMed Central journal article supplement (PMC4362229)
Supplement: JCI79526sd.pdf [file JCI79526sd.pdf]

***NLRP3 inflammasome triggers Th2-biased adaptive immunity that promotes leishmaniasis***

***Prajwal Gurung<sup>1</sup>, Rajendra Karki<sup>1</sup>, Peter Vogel<sup>2</sup>, Makiko Watanabe<sup>3</sup>, Mark Bix<sup>1</sup>, Mohamed Lamkanfi<sup>4,5</sup> and Thirumala-Devi Kanneganti<sup>1</sup>***

*<sup>1</sup>Departments of Immunology, <sup>2</sup>Animal Resources Center and the Veterinary Pathology Core, St. Jude Children's Research Hospital, Memphis, TN, 38105, United States. <sup>3</sup>College of Medicine, Department of Molecular Genetics and Microbiology, Univeristy of Gainesville, FL, USA. <sup>4</sup>Department of Medical Protein Research, VIB, and <sup>5</sup>Department of Biochemistry, Ghent University, Ghent, B-9000, Belgium.*

**A**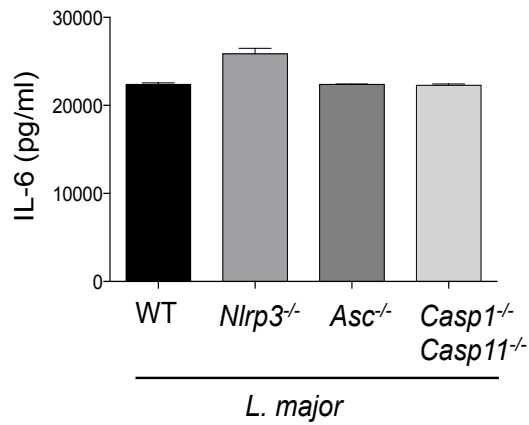**B**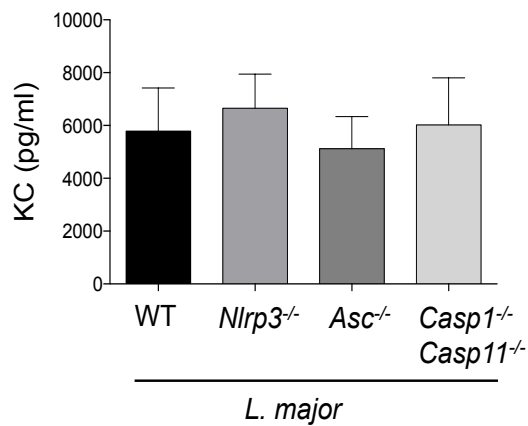**C**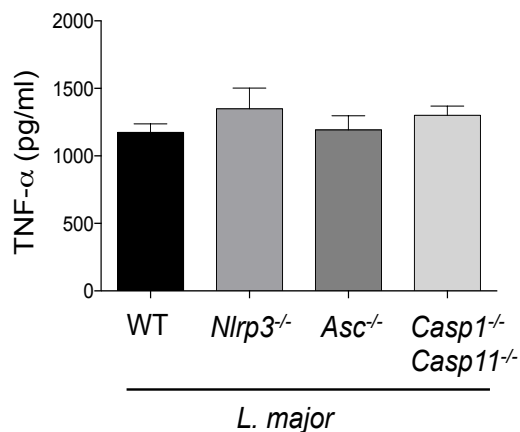

**Supplemental Figure 1. Inflammasome signaling does not affect *L. major*-induced production of IL-6, KC and TNF- $\alpha$  production by BMDM *in vitro*.** WT, *Nlrp3*<sup>-/-</sup>, *Asc*<sup>-/-</sup> and *Casp1*<sup>-/-</sup>*Casp11*<sup>-/-</sup> BMDMs were stimulated with 500 ng/ml LPS for 6 hours followed by *L. major* infection (20 m.o.i.) for 48 hours. IL-6 (A), KC (B) and TNF- $\alpha$  (C) cytokine levels in the supernatants were determined by ELISA. Data are presented as mean  $\pm$  s.e.m. and are representative of at least three independent experiments.

**A**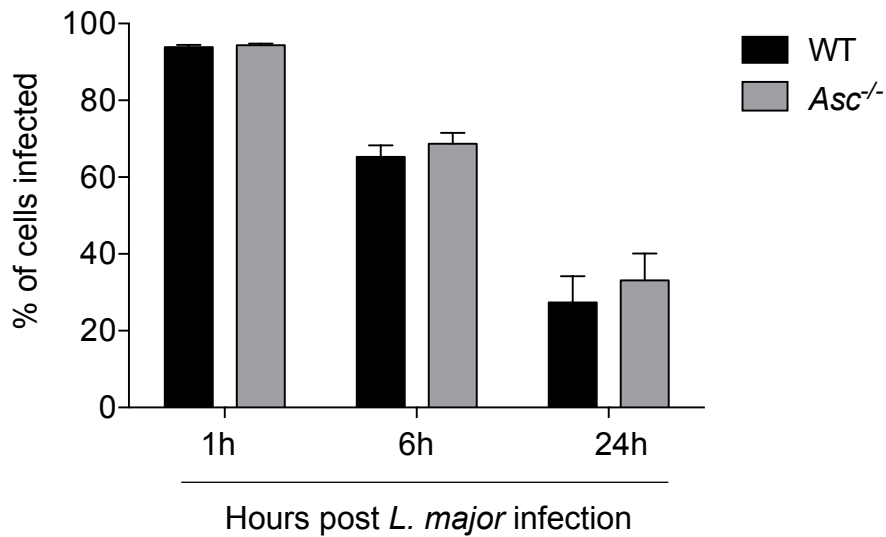**B**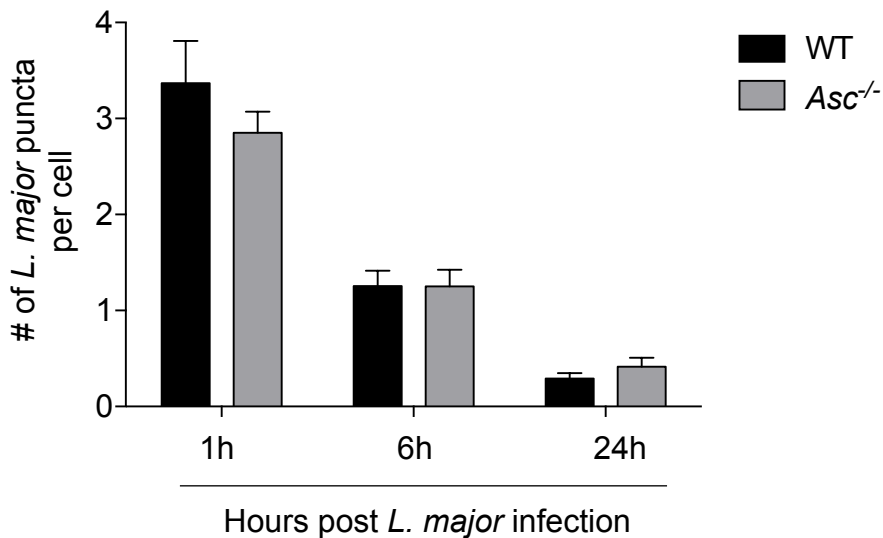

**Supplemental Figure 2. ASC deficiency does not alter phagocytosis and clearance of *L. major* by BMDM *in vitro*.** WT and *Asc*<sup>-/-</sup> BMDMs were infected with 20 m.o.i. *L. major* for 1h. Infected BMDMs were washed to remove excess *L. major* and supplemented with fresh media. BMDM were then stained with giemsa immediately to determine phagocytosis of *L. major* (1 hour). Other groups of BMDMs were incubated for additional 6 and 24 hours to determine clearance of phagocytosed *L. major* before staining the cells with giemsa stain (6 hour and 24 hour time points). Giemsa stained cells were examined under light microscope to visualize *L. major* phagocytosis and clearance. **(A)** Total number of cells that were infected in independent 40x areas were counted and represented as “% of infected cells”. **(B)** In the same 40x area, total numbers of *L. major* puncta were counted at each time point and represented as “# of *L. major* puncta per cell”. Data are presented as mean ± s.e.m. and are representative of at least three independent experiments.

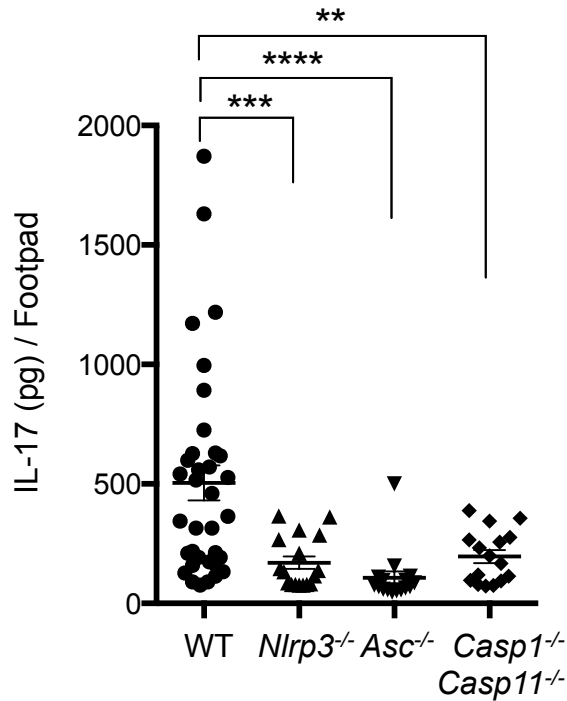

**Supplemental Figure 3. NLRP3 inflammasome deficiency results in reduced IL-17 levels following *L. major* infection *in vivo*.** Footpads from WT (n=35), *Nlrp3*<sup>-/-</sup> (n=17), *Asc*<sup>-/-</sup> (n=16) and *Casp1*<sup>-/-</sup>*Casp11*<sup>-/-</sup> (n=16) mice infected with 10<sup>6</sup> *L. major* promastigotes were harvested on day 28 and IL-17 cytokine in the footpads of infected mice were determined by ELISA. Ordinary one-way ANOVA (Dunnett's multiple comparisons test) was used to determine significance among groups. Data are presented as mean ± s.e.m. \*\* = p<0.01, \*\*\* = p<0.001, \*\*\*\* = p<0.0001

**A**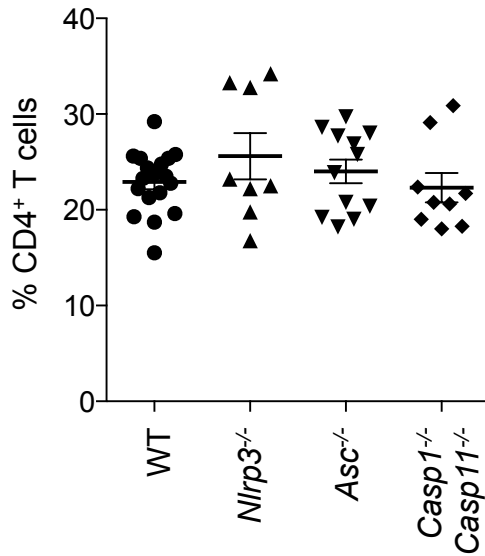**B**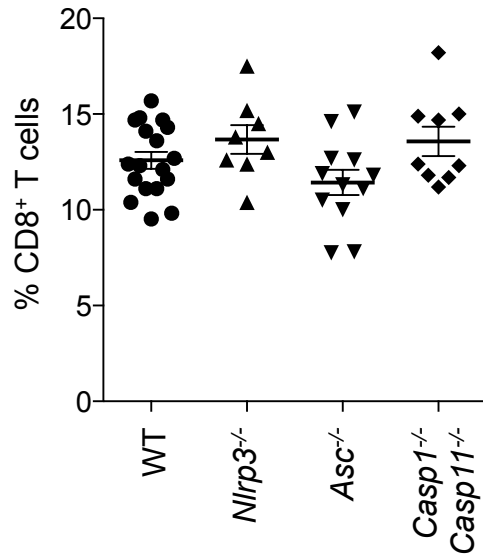

**Supplemental Figure 4. Frequencies of CD4<sup>+</sup> and CD8<sup>+</sup> T cells in the draining popliteal lymph nodes of 28 day infected mice.** WT (n=18), *Nlrp3*<sup>-/-</sup> (n=8), *Asc*<sup>-/-</sup> (n=12) and *Casp1*<sup>-/-</sup> *Casp11*<sup>-/-</sup> (n=9) mice were infected with 10<sup>6</sup> *L. major* promastigotes. Infected mice were euthanized 28 days later and draining popliteal lymph nodes were harvested. Single cell suspensions of popliteal lymph node cells were stained with anti-CD4 and anti-CD8 monoclonal antibodies. Frequency of CD4<sup>+</sup> (**A**) and CD8<sup>+</sup> T cells (**B**) were analyzed by flow cytometry. Data are presented as mean ± s.e.m.

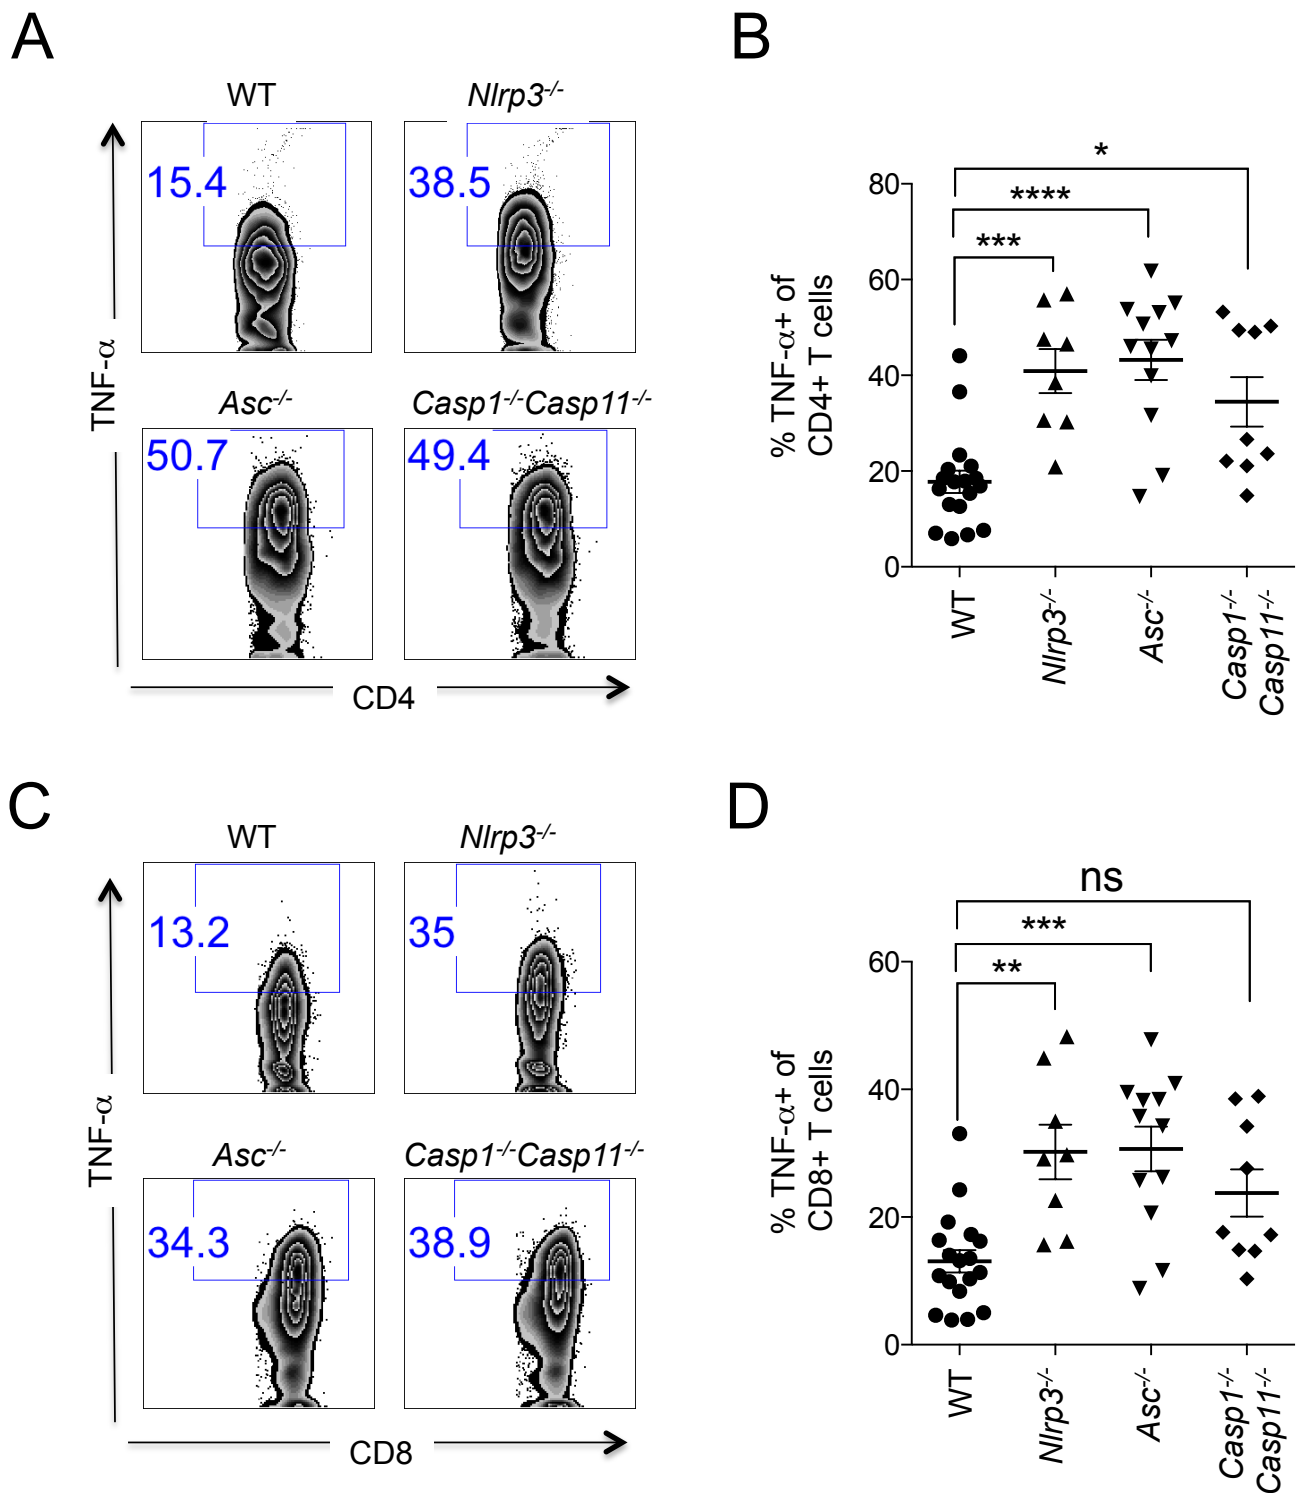

**Supplemental Figure 5. Inflammasome deficient CD4<sup>+</sup> and CD8<sup>+</sup> T cells produce higher levels of TNF- $\alpha$  during *L. major* infection. (A-D) WT (n=18), *Nlrp3*<sup>-/-</sup> (n=8), *Asc*<sup>-/-</sup> (n=12) and *Casp1*<sup>-/-</sup>*Casp11*<sup>-/-</sup> (n=9) mice were infected with 10<sup>6</sup> *L. major* promastigotes. Infected mice were euthanized 28 days later and draining popliteal lymph nodes were harvested. Single cell suspensions of popliteal lymph node cells were stimulated anti-CD3/anti-CD28 for 4 hours and TNF- $\alpha$  production by CD4<sup>+</sup> (A and B) and CD8<sup>+</sup> (C and D) T cells were determined by flow staining and flow cytometry. Groups were tested for significance using Dunnett's multiple comparisons test. Data are presented as mean  $\pm$  s.e.m. ns= not significant, \*= $p$ <0.05, \*\*= $p$ <0.01, \*\*\*= $p$ <0.001, \*\*\*\*= $p$ <0.0001.**

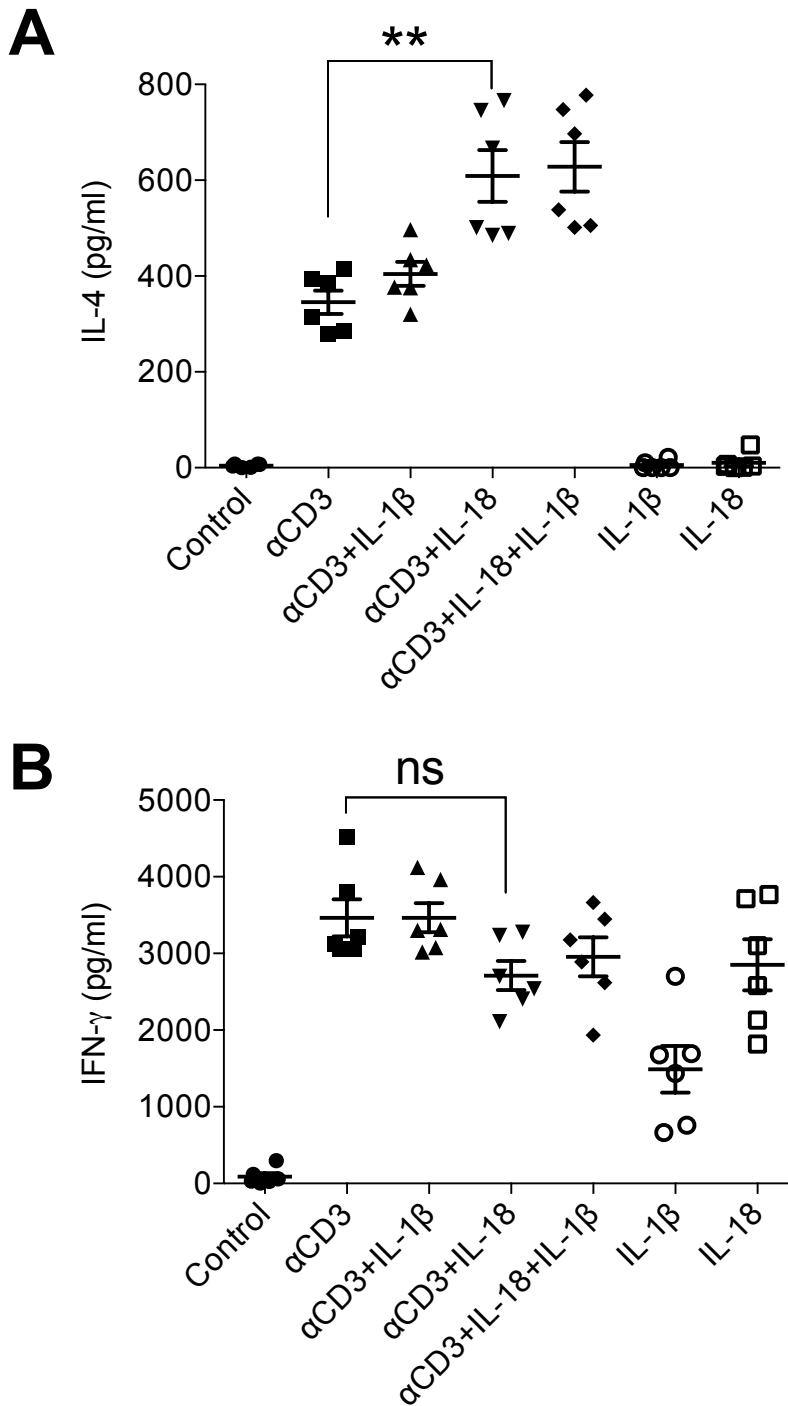

**Supplemental Figure 6. IL-1 $\beta$  and IL-18 stimulation alone are sufficient to induce IFN- $\gamma$  production but not IL-4.** WT splenocytes were stimulated with anti-CD3 Ab in the presence of IL-1 $\beta$  and IL-18. In some settings splenocytes were stimulated with IL-1 $\beta$  or IL-18 alone. After 72 hours of stimulation, supernatants were collected and analyzed for IL-4 (**A**) and IFN- $\gamma$  (**B**) by ELISA. Data are presented as mean  $\pm$  s.e.m. and are representative of at least three independent experiments. Significance between  $\alpha$ CD3 and  $\alpha$ CD3+IL-18 were determined using Mann Whitney test. ns=not significant and \*\*= $p < 0.01$ .

**A**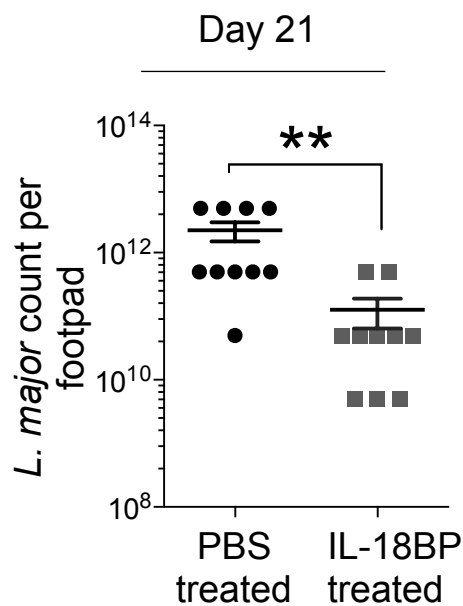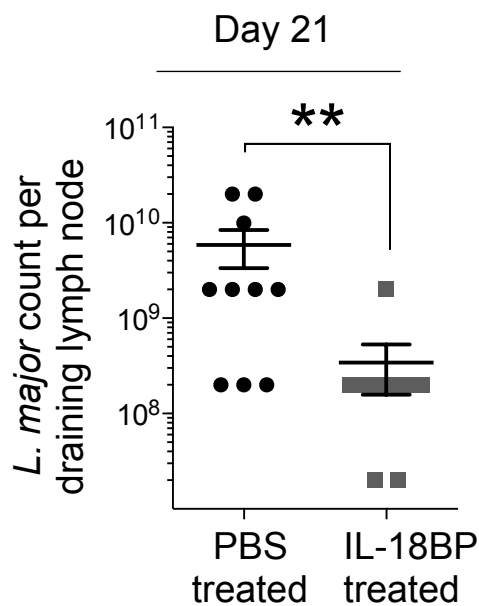**B**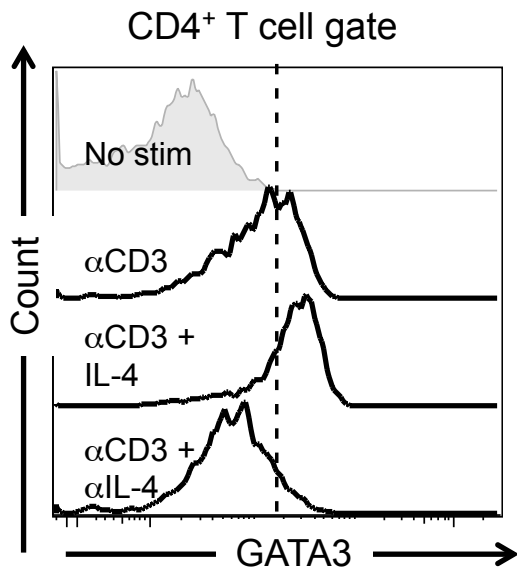**C**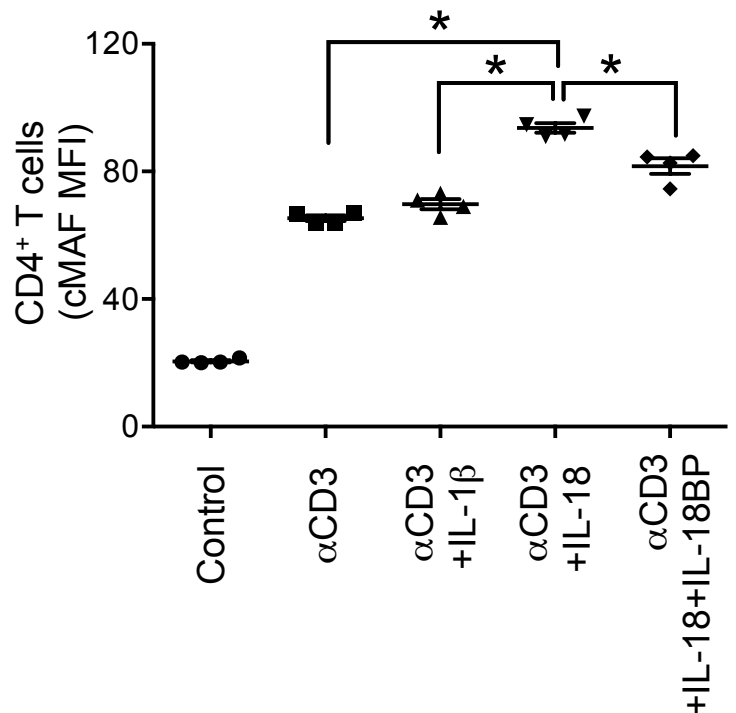

**Supplemental Figure 7. IL-18 attenuates *L. major* infection *in vivo* and IL-4 enhances GATA3.** (A) WT BALB/c mice were treated with PBS (n=10) or IL-18BP (n=10) at day -1, 0, 1, 3, 7 and 14. On day 21 *L. major* titers in the footpads and draining lymph nodes of infected mice were determined using limiting dilution assay as described in the methods section. (B and C) Single cell suspension of splenocytes from WT BALB/c mice were stimulated with anti-CD3 Ab in the presence of rIL-4, anti-IL4 Ab, IL-1β or IL-18 for 48 hours. (B) Representative histograms for GATA3 expression during rIL-4 or anti-IL4 treatment are shown. (C) cMAF MFI of CD4<sup>+</sup> T cells during IL-1β and IL-18 treatment are shown. Mann Whitney test used for significance test. Data are shown at mean ± s.e.m. B and C are representative of at least two independent experiments. \*= $p < 0.05$ , \*\*= $p < 0.01$ .
